# Supplementary material for: DNA methylation at enhancers identifies distinct breast cancer lineages
Source: PubMed Central journal article supplement (PMC5680222; doi:10.1038/s41467-017-00510-x), 2017-11-09
Supplement: 41467_2017_510_MOESM1_ESM.pdf [file 41467_2017_510_MOESM1_ESM.pdf]

File Name: Supplementary Information

Description: Supplementary Figures and Supplementary Tables

File Name: Supplementary Data 1

Description: Enrichment of emQTL, Cluster 1 and Cluster 2 CpGs over the expected frequency of CpGs from the Illumina HumanMethylation450 across 111 ChIP-seq data sets from the MCF7 cell line.

File Name: Supplementary Data 2

Description: Genomic location of the CpGs in Cluster 2 and their annotation of CpGs from the Illumina HumanMethylation450k across 111 ChIP-seq data sets from the MCF7 cell line.

File Name: Peer Review File

Description:

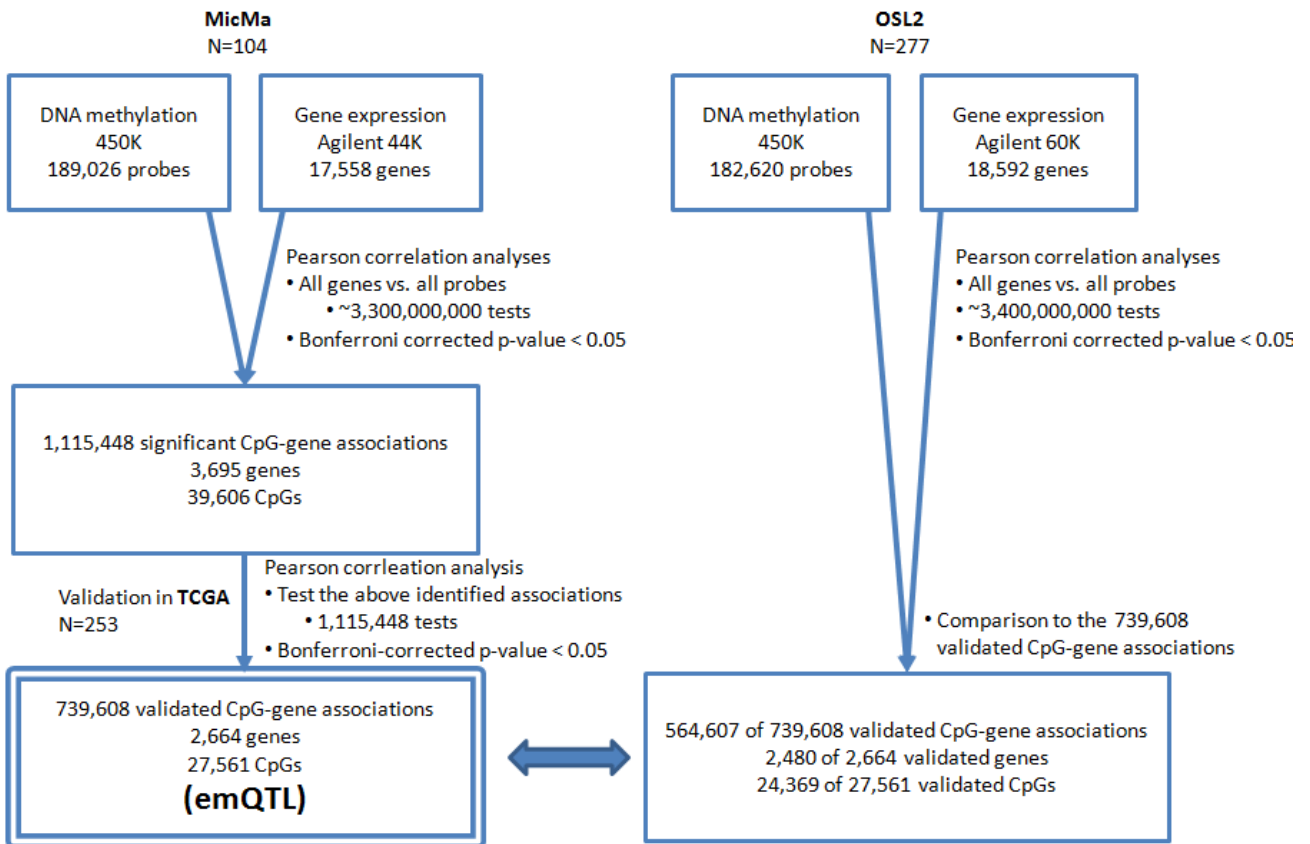

**Supplementary Figure 1: Flow chart of the identification of the significant genome-wide associations between DNA methylation and gene expression (emQTL).**

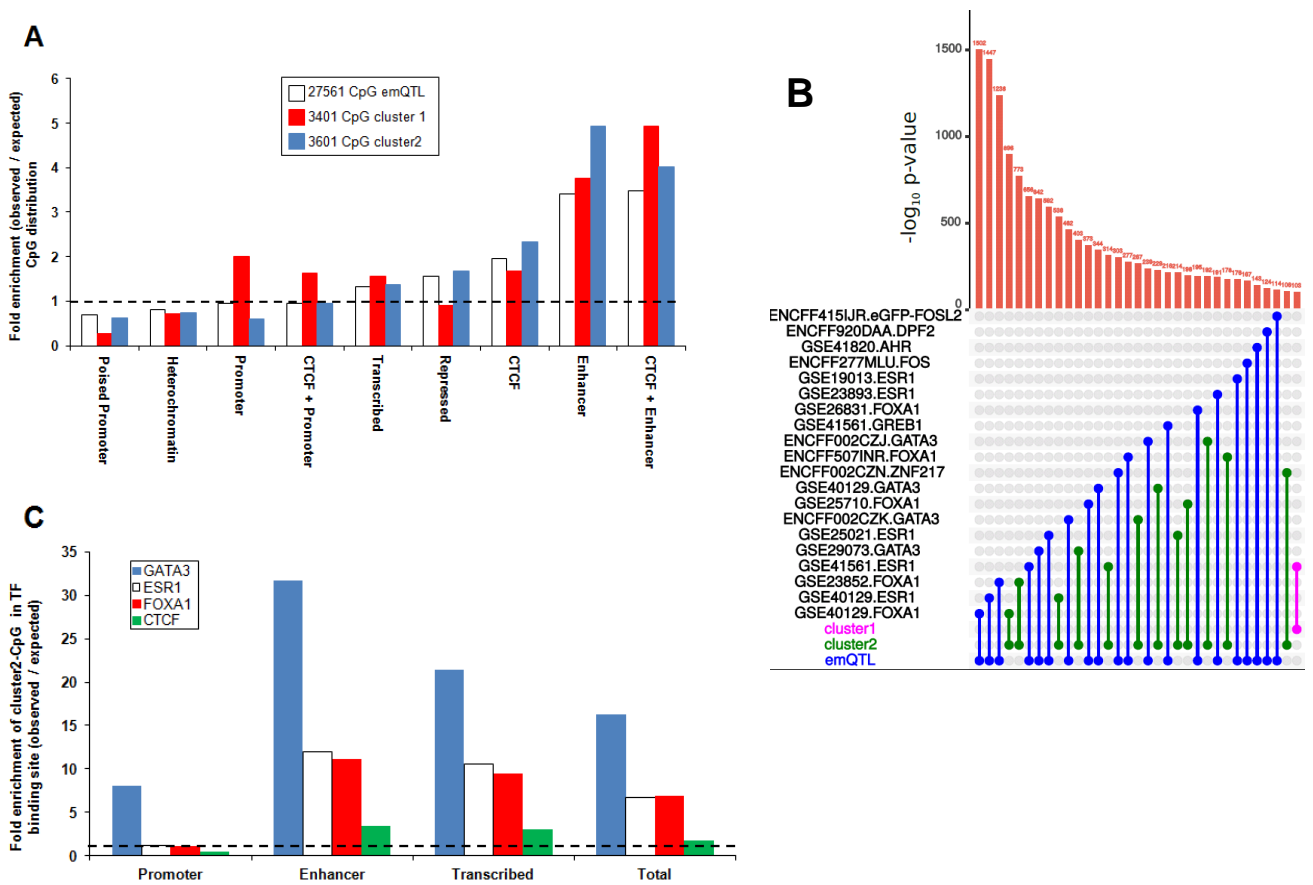

## Supplementary Figure 2: Genomic location of emQTL according to ChromHMM and TF binding regions

**A)** Bar plot showing the association of emQTL, Cluster 1 and Cluster 2 across functional/regulatory regions of the genome as determined by MCF7 ChromHMM annotation (Taberlay et al. 2014). The height of the bars represents the level of enrichment measured as a ratio between the frequency of emQTL (white), Cluster 1 (red) and Cluster 2 (blue) CpGs overlapping a functional element over the expected frequency if such overlaps were to occur at random in the genome. **B)** Most significant enrichment of emQTL, Cluster1 and Cluster2 CpGs across 71 ENCODE and 40 GEO ChIP-seq experiments performed in the MCF7 cell line. The height of the bar plot represent  $-\log(p\text{-value})$  of the hypergeometric test assessing for enrichment of emQTL, Cluster1 or Cluster2 CpG over the distribution off Illumina HumanMethylation450k CpGs. **C)** Enrichment analysis of CpGs in Cluster 2 across ER $\alpha$  (white), GATA3 (blue), FOXA1 (red) and CTCF (green) binding regions as determined by ChIP-seq analysis. Enrichment is calculated at different genomic regions determined by MCF7 ChromHMM annotation. For this analysis some ChromHMM annotations were collapsed into one as follow: Enhancer='Enhancer' and 'Enhancer+CTCF' and Promoter='Promoter', 'Promoter+CTCF' and 'Poised Promoter'. The height of the bars represents the level of enrichment measured as a ratio between the frequency of Cluster 2-CpG in each ChIP-seq peak at specific regulatory region over the expected frequency if such overlaps were to occur at random in the genome. Statistically significant enrichments ( $p$  value  $< 1 \times 10^{-10}$ ; hypergeometric test) are marked with an asterisk.

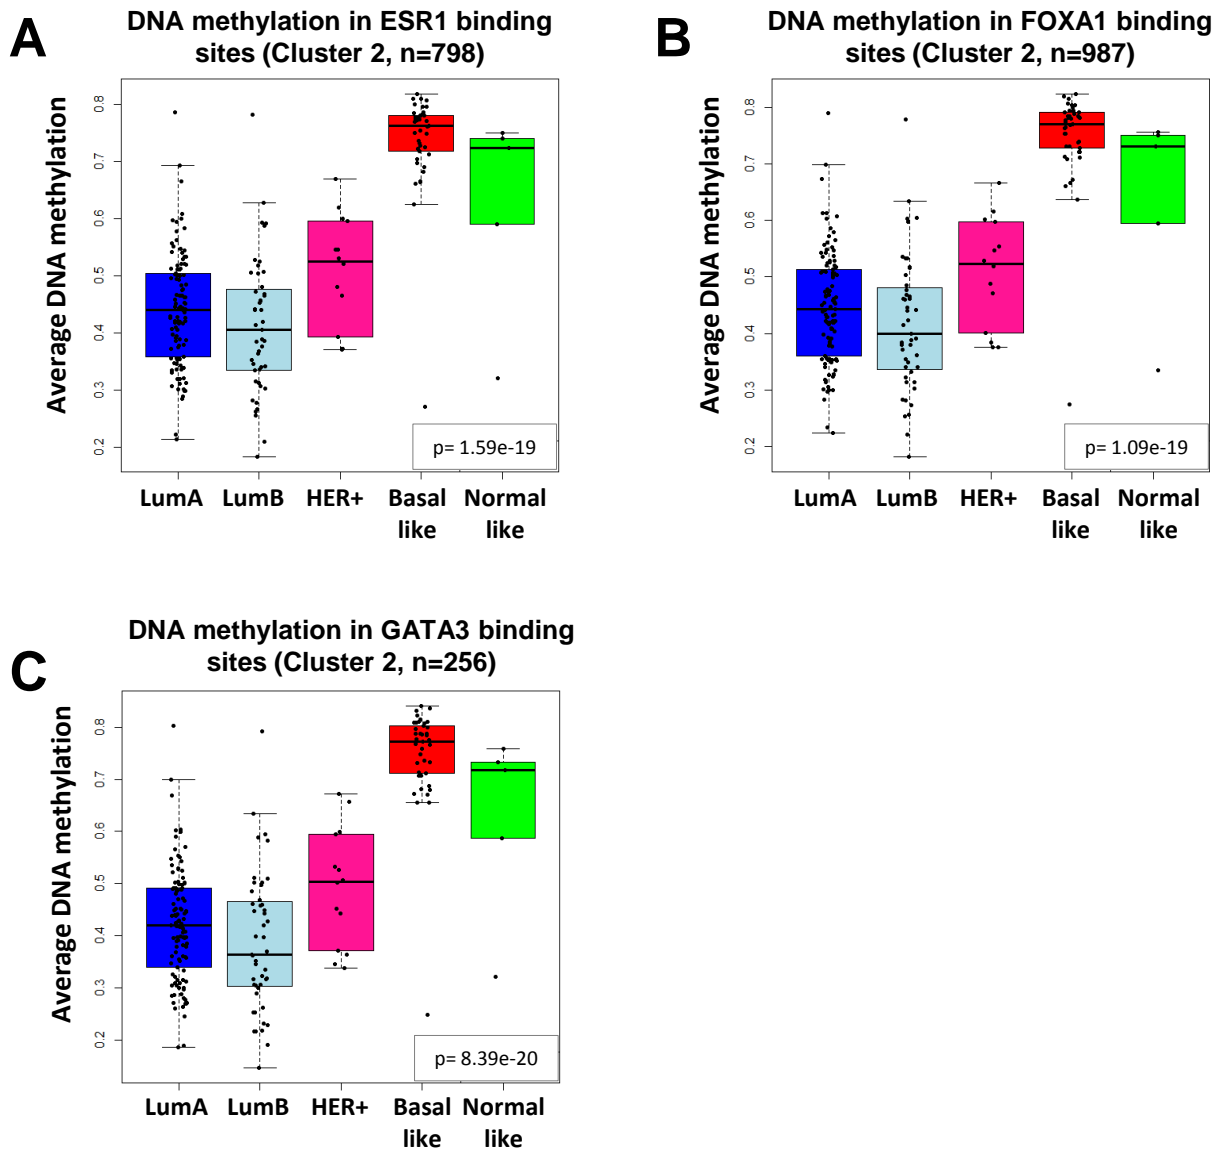

**Supplementary Figure 3: Average DNA methylation of CpGs in Cluster 2 and in TF binding regions according to PAM50 subtype**

Average DNA methylation of CpGs in Cluster 2 and ER $\alpha$  (A: n=798), FOXA1 (B: n=987) and GATA3 (C: n=265) binding regions defined by ChIP-seq peaks. Box plots represent the average DNA methylation of these CpGs in Luminal A (blue, n=110), Luminal B (light blue, n=48), Her2+ (pink, n=15), Basal like (red, n=42), Normal like (green, n=5) from the TCGA cohort.

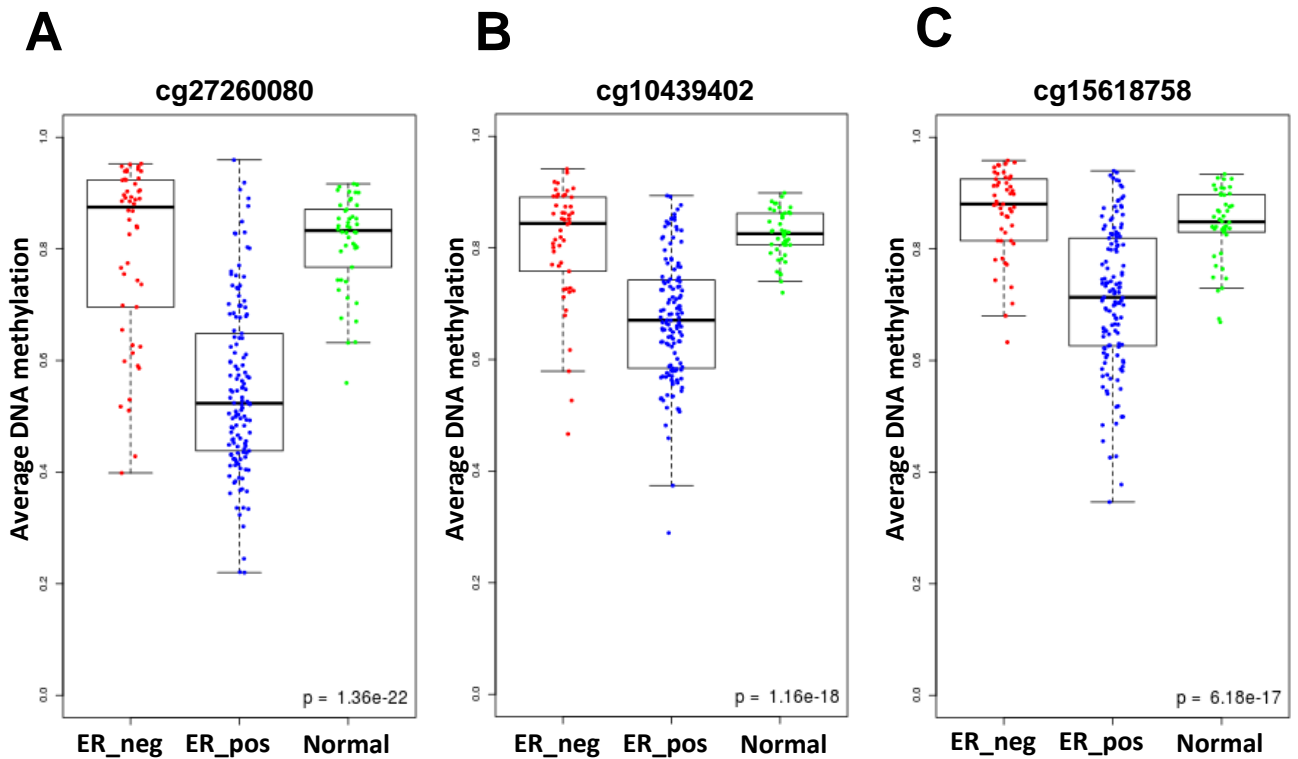

**Supplementary Figure 4: Examples of CpGs at TF binding region significantly demethylated in ER-positive disease compared to healthy tissue.**

The DNA methylation of three probes in Cluster 2 and TF binding regions: **A)** cg27260080, **B)** cg10439402 and **C)** cg15618758). All three probes are specifically demethylated in ER positive tumors (Kruskal Wallis p-value =  $1.36 \times 10^{-22}$ ,  $1.16 \times 10^{-18}$  and  $6.18 \times 10^{-17}$ , respectively)

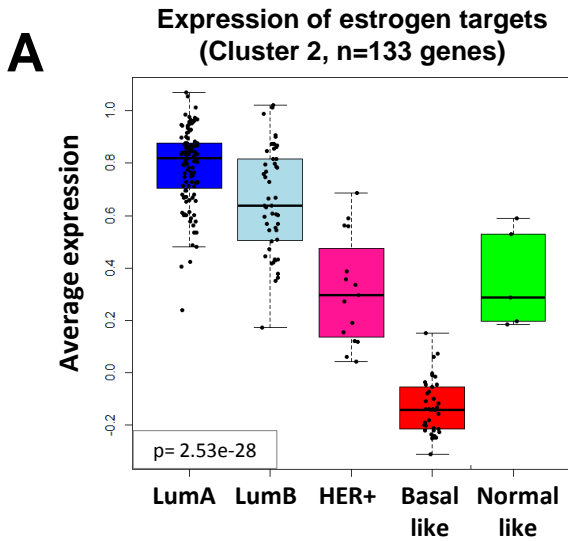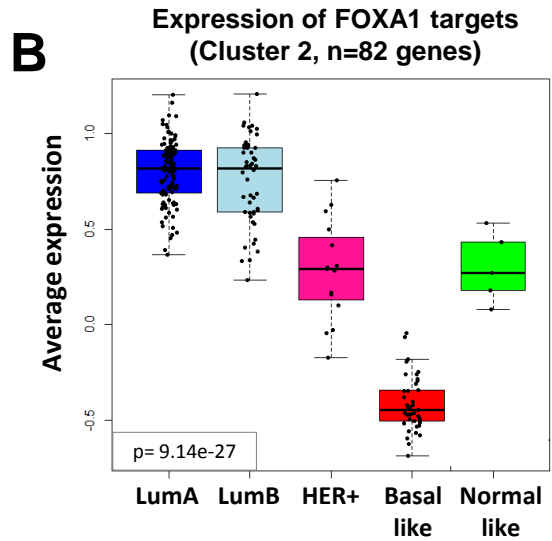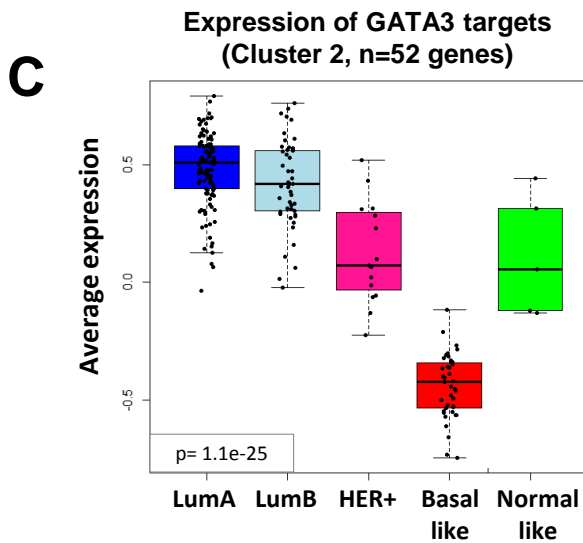

**Supplementary Figure 5: Average gene expression of genes in Cluster 2 and targets TFs according to PAM50 subtype**

Average expression of gene in Cluster 2 and target of ER $\alpha$  (A: n=133), FOXA1 (B: n=82) and GATA3 (C: n=52) experimentally defined by siRNA-RNAseq or Gro-seq experiments. Box plots represent the average expression of these genes in Luminal A (blue, n=110), Luminal B (light blue, n=48), Her2 enriched (pink, n=15), Basal like (red, n=42), Normal like (green, n=5) from the TCGA cohort.

**A** DNA methylation at cg00601836 in ESR1 promoter vs ESR1 expression

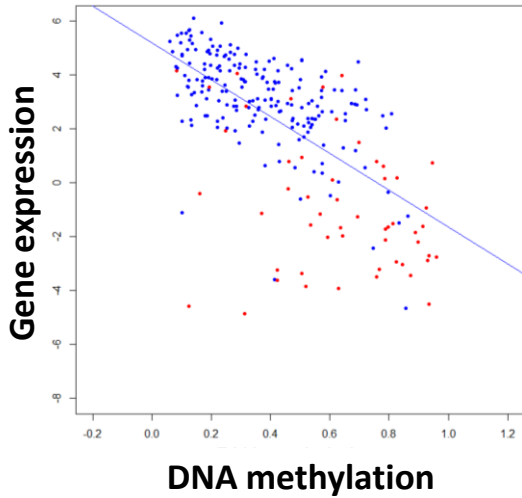

**B** DNA methylation at cg27143688 in FOXA1 promoter vs FOXA1

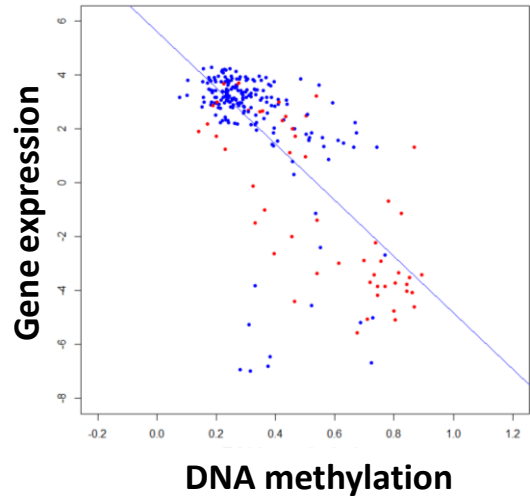

**C** DNA methylation at cg4213746 in GATA3 promoter vs GATA3 expression

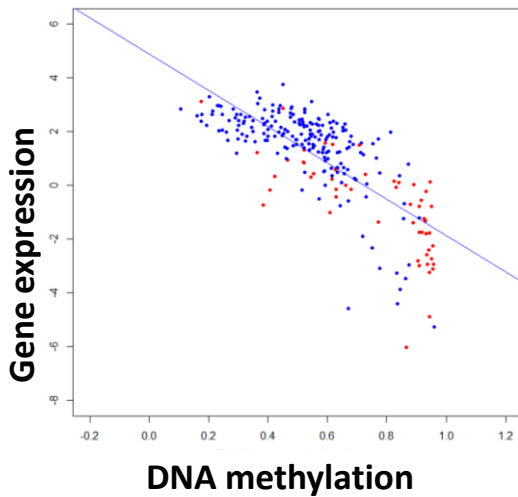

**Supplementary Figure 6:** Correlation between promoter methylation and expression of **A)** *ESR1*, **B)** *FOXA1* and **C)** *GATA3*.

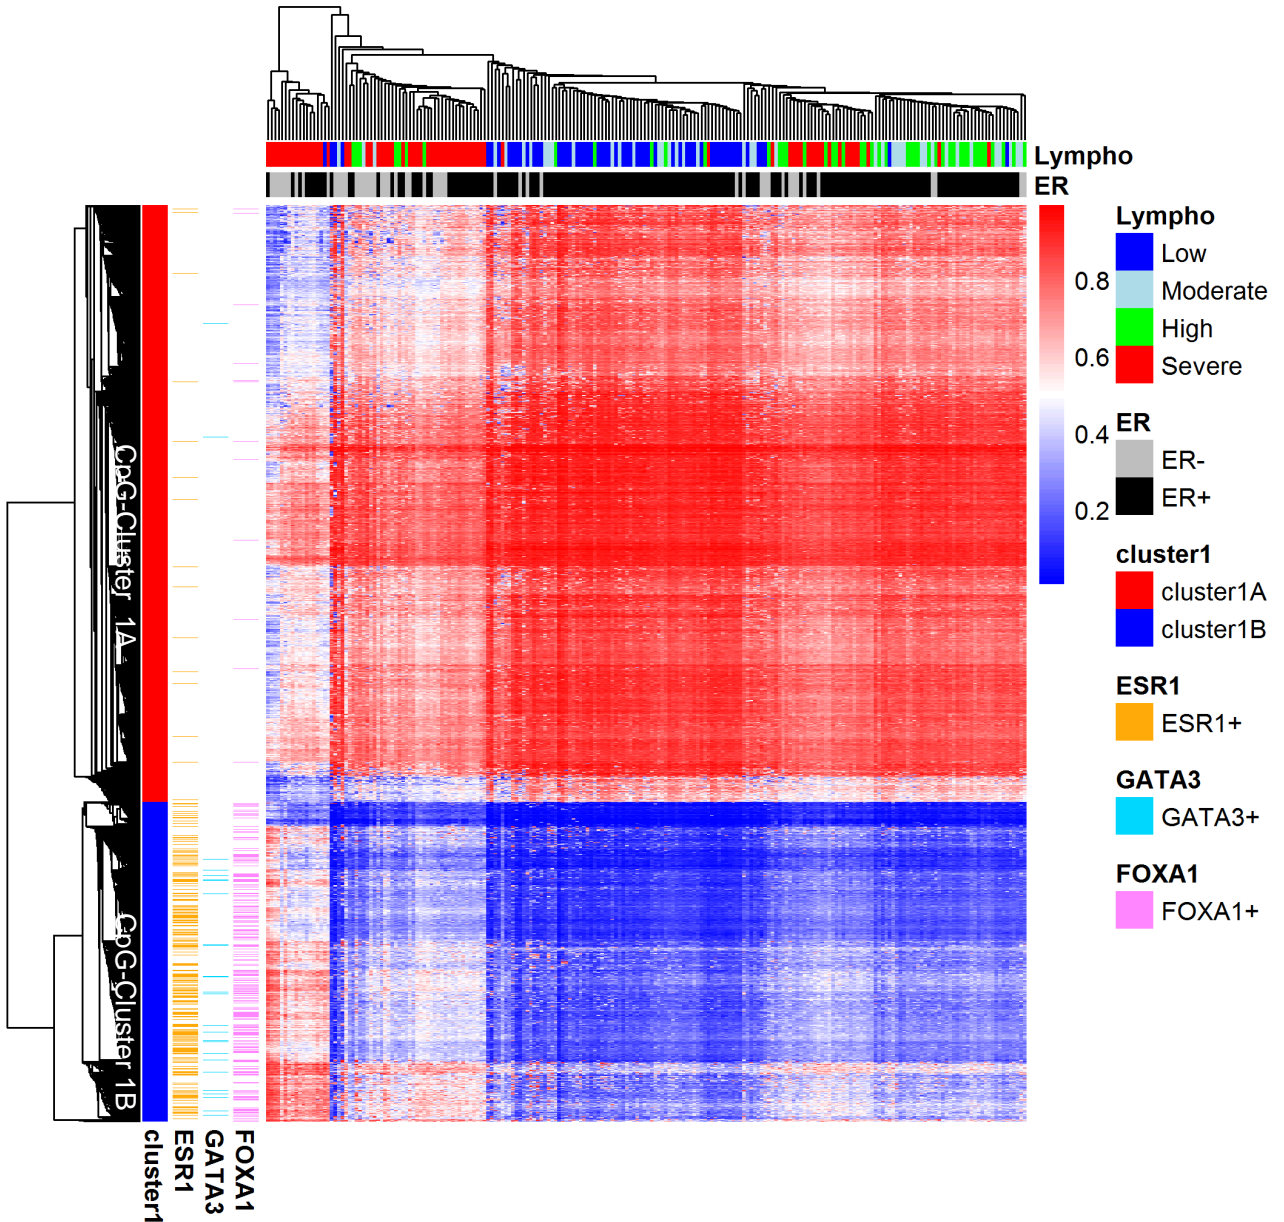

**Supplementary Figure 7: Unsupervised clustering of DNA methylation in breast cancer patients using emQTL CpGs in Cluster 1.**

Unsupervised clustering of DNA methylation levels of the 3401 CpGs in Cluster 1 from 213 patients of the TCGA cohort with PAM50 information. Annotation of the rows of the heatmap shows whether a CpG is located in ER $\alpha$  (yellow), FOXA1 (pink) or GATA3 (light blue) binding regions according to ChIP-seq experiments in MCF7 cells. Annotations of the column of the heatmap indicate histopathological features of the patients: PAM50 subtype, ER and progesterone receptor (PR) status.



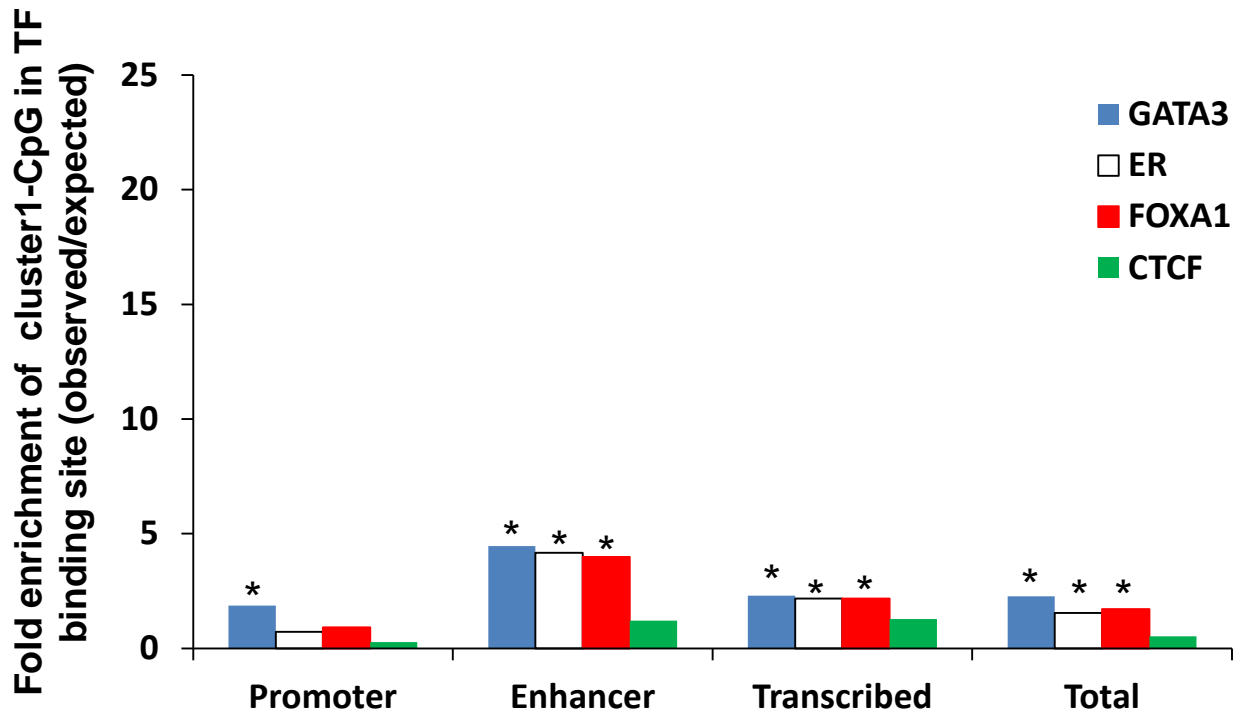

**Supplementary Figure 8: Enrichment analysis of CpGs in Cluster 1 across ER $\alpha$  (white), GATA3 (blue), FOXA1 (red) and CTCF (green) binding regions as determined by ChIP-seq analysis.** Enrichment is calculated at different genomic regions determined by MCF7 ChromHMM annotation. For this analysis some ChromHMM annotations were collapsed into one as follow: Enhancer='Enhancer' and 'Enhancer+CTCF' and Promoter='Promoter', 'Promoter+CTCF' and 'Poised Promoter'. The height of the bars represents the level of enrichment measured as a ratio between the frequency of Cluster 1-CpG in each ChIP-seq peak at specific regulatory region over the expected frequency if such overlaps were to occur at random in the genome. The dotted bars represent the level of enrichment of cluster2-CpGs in the respective ChIP-seq regions and ChromHMM annotations.

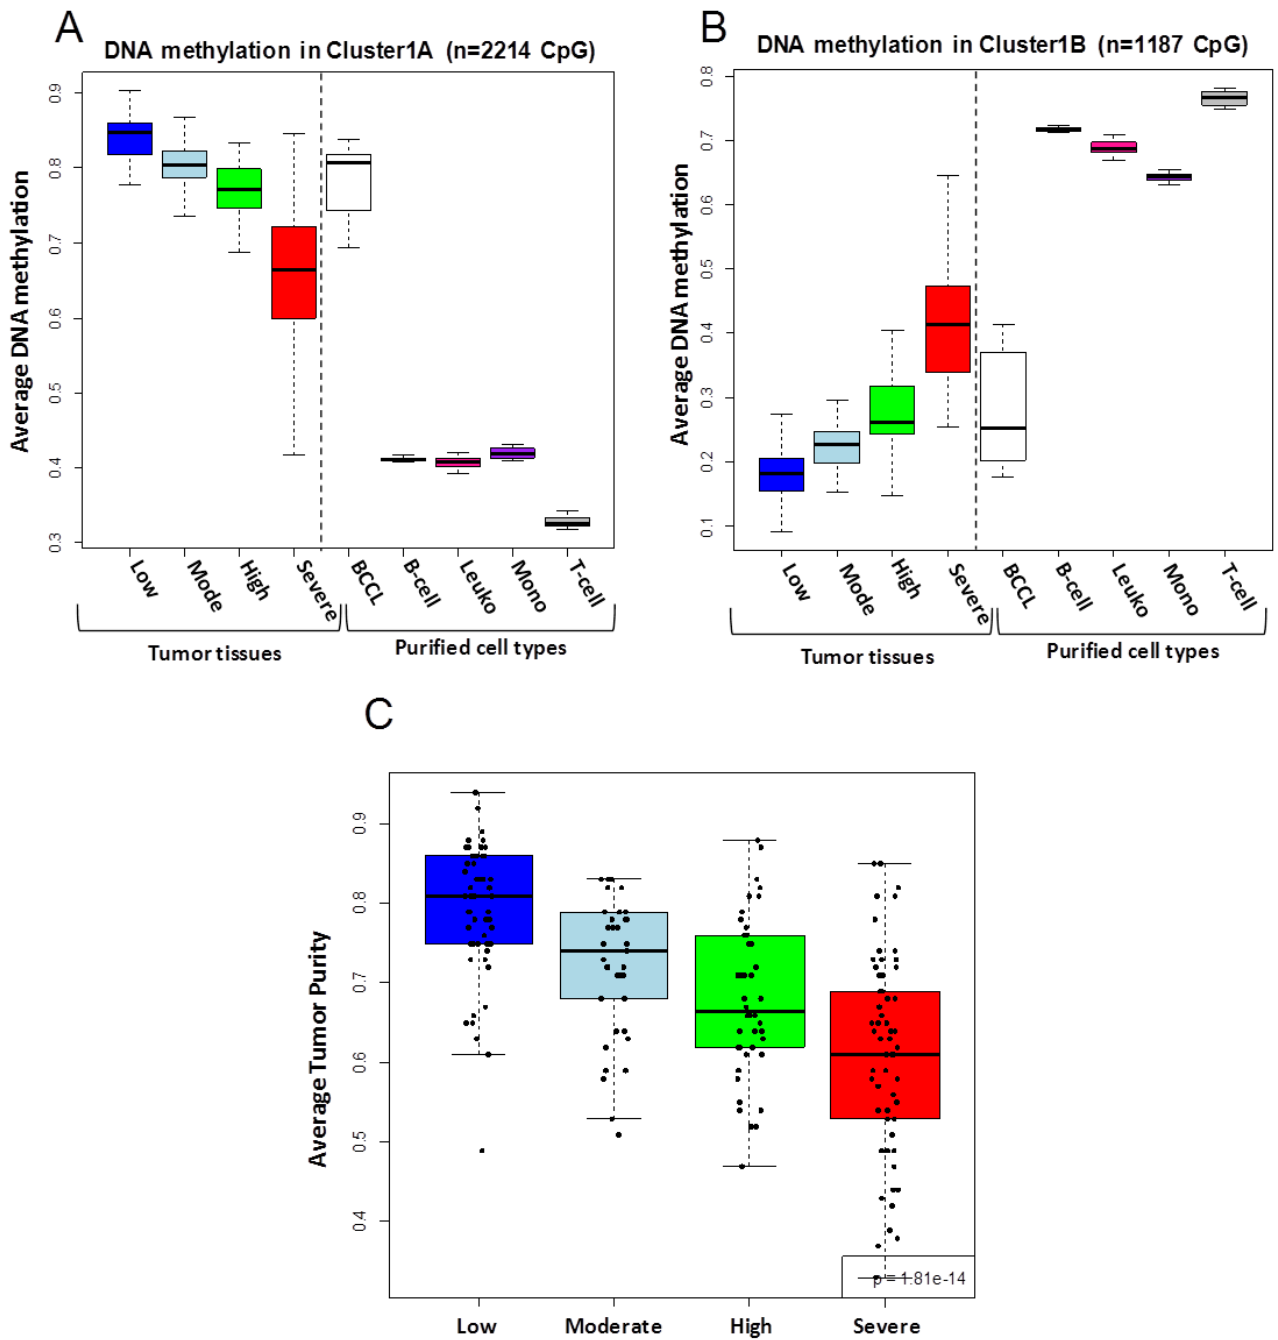

**Supplementary Figure 9:** DNA methylation of the 2214 CpGs of Cluster1A (A) or 1187 CpGs of Cluster1B (B) in Breast Cancer cell lines (BCCL, n=12), T cells (n=12), Leukocytes (n=12), Monocytes (n=12), B cells (n=7), TCGA tumor samples with low (n=58), moderate (n=41), high (n=46) or severe (n=69) lymphocyte infiltration. (C) Tumor purity measured using TCGA DNA methylation data and InfimiumPurity (Zheng et al 2017) in perspective of lymphocyte infiltration measured by Nanodissect.

**Supplementary Table 1: Motif enrichment analysis  $\pm$  200bp around the CpG of Cluster 1**

| <b>Motif Name</b>                                                | <b>Consensus</b>   | <b>P-value</b> |
|------------------------------------------------------------------|--------------------|----------------|
| Fli1(ETS)/CD8-FLI-ChIP-Seq(GSE20898)/Homer                       | NRYTTCCGGH         | 1,00E-12       |
| ETS1(ETS)/Jurkat-ETS1-ChIP-Seq(GSE17954)/Homer                   | ACAGGAAGTG         | 1,00E-08       |
| ETV1(ETS)/GIST48-ETV1-ChIP-Seq(GSE22441)/Homer                   | AACCGGAAGT         | 1,00E-08       |
| EWS:ERG-fusion(ETS)/CADO_ES1-EWS:ERG-ChIP-Seq(SRA014231)/Homer   | ATTCCTGTN          | 1,00E-08       |
| RUNX2(Runt)/PCa-RUNX2-ChIP-Seq(GSE33889)/Homer                   | NWAACCACADNN       | 1,00E-07       |
| ETS(ETS)/Promoter/Homer                                          | AACCGGAAGT         | 1,00E-07       |
| EWS:FLI1-fusion(ETS)/SK_N_MC-EWS:FLI1-ChIP-Seq(SRA014231)/Homer  | VACAGGAAAT         | 1,00E-07       |
| ERG(ETS)/VCaP-ERG-ChIP-Seq(GSE14097)/Homer                       | ACAGGAAGTG         | 1,00E-06       |
| Ets1-distal(ETS)/CD4+-PolII-ChIP-Seq(Barski et al.)/Homer        | MACAGGAAGT         | 1,00E-06       |
| RUNX(Runt)/HPC7-Runx1-ChIP-Seq(GSE22178)/Homer                   | SAAACCACAG         | 1,00E-05       |
| RUNX-AML(Runt)/CD4+-PolII-ChIP-Seq(Barski et al.)/Homer          | GCTGTGGTTW         | 1,00E-05       |
| Elk1(ETS)/Hela-Elk1-ChIP-Seq(GSE31477)/Homer                     | HACTTCCGGY         | 1,00E-05       |
| ELF1(ETS)/Jurkat-ELF1-ChIP-Seq(SRA014231)/Homer                  | AVCCGGAAGT         | 1,00E-05       |
| IRF2(IRF)/Erythroblasts-IRF2-ChIP-Seq(GSE36985)/Homer            | GAAASYGAAASY       | 1,00E-04       |
| Elk4(ETS)/Hela-Elk4-ChIP-Seq(GSE31477)/Homer                     | NRYTTCCGGY         | 1,00E-04       |
| Nkx3.1(Homeobox)/LNCaP-Nkx3.1-ChIP-Seq(GSE28264)/Homer           | AAGCACTTAA         | 1,00E-04       |
| E2F7(E2F)/Hela-E2F7-ChIP-Seq(GSE32673)/Homer                     | VDTTCCCGCCA        | 1,00E-04       |
| PRDM1(Zf)/Hela-PRDM1-ChIP-Seq(GSE31477)/Homer                    | ACTTTCCTTTC        | 1,00E-03       |
| GABPA(ETS)/Jurkat-GABPA-ChIP-Seq(GSE17954)/Homer                 | RACCGGAAGT         | 1,00E-03       |
| Srebp1a(bHLH)/HepG2-Srebp1a-ChIP-Seq(GSE31477)/Homer             | RTCACSCCAY         | 1,00E-03       |
| IRF4(IRF)/GM12878-IRF4-ChIP-Seq(GSE32465)/Homer                  | ACTGAAACCA         | 1,00E-03       |
| IRF1(IRF)/PBMC-IRF1-ChIP-Seq(GSE43036)/Homer                     | GAAAGTGAAAGT       | 1,00E-03       |
| bZIP:IRF(bZIP,IRF)/Th17-BatF-ChIP-Seq(GSE39756)/Homer            | NAGTTTCABTHTGACTNW | 1,00E-03       |
| RUNX1(Runt)/Jurkat-RUNX1-ChIP-Seq(GSE29180)/Homer                | AAACCACARM         | 1,00E-03       |
| NFkB-p50,p52(RHD)/Monocyte-p50-ChIP-Chip(Schreiber et al.)/Homer | GGGGGAATCCCC       | 1,00E-03       |
| SpiB(ETS)/OCILY3-SPIB-ChIP-Seq(GSE56857)/Homer                   | AAAGRGGGAAGTG      | 1,00E-02       |
| PU.1(ETS)/ThioMac-PU.1-ChIP-Seq(GSE21512)/Homer                  | AGAGGAAGTG         | 1,00E-02       |
| Eomes(T-box)/H9-Eomes-ChIP-Seq(GSE26097)/Homer                   | ATTAACACCT         | 1,00E-02       |
| ISRE(IRF)/ThioMac-LPS-Expression(GSE23622)/Homer                 | AGTTTCASTTTC       | 1,00E-02       |
| RLR1?/SacCer-Promoters/Homer                                     | WTTTTCYTTTTT       | 1,00E-02       |
| ETS:RUNX(ETS,Runt)/Jurkat-RUNX1-ChIP-Seq(GSE17954)/Homer         | RCAGGATGTGGT       | 1,00E-02       |
| PU.1-IRF(ETS:IRF)/Bcell-PU.1-ChIP-Seq(GSE21512)/Homer            | MGGAAGTGAAAC       | 1,00E-02       |

**Supplementary Table 2: Motif enrichment analysis  $\pm$  200bp around the CpG of Cluster 2**

| <b>Motif Name</b>                                                 | <b>Consensus</b>          | <b>P-value</b> |
|-------------------------------------------------------------------|---------------------------|----------------|
| FOXA1(Forkhead)/MCF7-FOXA1-ChIP-Seq(GSE26831)/Homer               | WAAGTAAACA                | 1,00E-21       |
| FOXA1(Forkhead)/LNCAP-FOXA1-ChIP-Seq(GSE27824)/Homer              | WAAGTAAACA                | 1,00E-21       |
| Foxa2(Forkhead)/Liver-Foxa2-ChIP-Seq(GSE25694)/Homer              | CYTGTTTACWYW              | 1,00E-16       |
| Fox:Ebox(Forkhead,bHLH)/Panc1-Foxa2-ChIP-Seq(GSE47459)/Homer      | NNNVCTGWGYAAACAS<br>N     | 1,00E-12       |
| GATA(Zf),IR3/iTreg-Gata3-ChIP-Seq(GSE20898)/Homer                 | NNNNNBAGATAWYATC<br>TVHN  | 1,00E-11       |
| GATA(Zf),IR4/iTreg-Gata3-ChIP-Seq(GSE20898)/Homer                 | NAGATWNB NATCTNN          | 1,00E-11       |
| Gata4(Zf)/Heart-Gata4-ChIP-Seq(GSE35151)/Homer                    | NBWGATAAGR                | 1,00E-09       |
| Gata2(Zf)/K562-GATA2-ChIP-Seq(GSE18829)/Homer                     | BBCTTATCTS                | 1,00E-07       |
| FOXA1:AR(Forkhead,NR)/LNCAP-AR-ChIP-Seq(GSE27824)/Homer           | AGTAAACAAAAAAGAA<br>CAND  | 1,00E-07       |
| GATA3(Zf)/iTreg-Gata3-ChIP-Seq(GSE20898)/Homer                    | AGATAASR                  | 1,00E-07       |
| PHA-4(Forkhead)/cElegans-Embryos-PHA4-ChIP-Seq(modEncode)/Homer   | KTGTTTGC                  | 1,00E-07       |
| Gata1(Zf)/K562-GATA1-ChIP-Seq(GSE18829)/Homer                     | SAGATAAGRV                | 1,00E-06       |
| PQM-1(?)/cElegans-L3-ChIP-Seq(modEncode)/Homer                    | ACTGATAAGA                | 1,00E-05       |
| ELT-3(Gata)/cElegans-L1-ELT3-ChIP-Seq(modEncode)/Homer            | AWTGATAAGA                | 1,00E-04       |
| Pax7(Paired,Homeobox),long/Myoblast-Pax7-ChIP-Seq(GSE25064)/Homer | TAATCHGATTAC              | 1,00E-04       |
| FOXP1(Forkhead)/H9-FOXP1-ChIP-Seq(GSE31006)/Homer                 | NYYTGTTTACHN              | 1,00E-04       |
| Lhx3(Homeobox)/Neuron-Lhx3-ChIP-Seq(GSE31456)/Homer               | ADBTAATTAR                | 1,00E-03       |
| GATA3(Zf),DR8/iTreg-Gata3-ChIP-Seq(GSE20898)/Homer                | AGATSTNDNND SAGATA<br>ASN | 1,00E-02       |
| Tcfcp2l1(CP2)/mES-Tcfcp2l1-ChIP-Seq(GSE11431)/Homer               | NRAACCRGTTYRAACCR<br>GYT  | 1,00E-02       |
| GATA3(Zf),DR4/iTreg-Gata3-ChIP-Seq(GSE20898)/Homer                | AGATGKDGAGATAAG           | 1,00E-02       |
| Ap4(bHLH)/AML-Tfap4-ChIP-Seq(GSE45738)/Homer                      | NAHCAGCTGD                | 1,00E-02       |
| LXRE(NR),DR4/RAW-LXRb.biotin-ChIP-Seq(GSE21512)/Homer             | RGGTTACTANAGGTCA          | 1,00E-02       |
| Rbpj1(?)/Panc1-Rbpj1-ChIP-Seq(GSE47459)/Homer                     | HTTCCASG                  | 1,00E-02       |
| Mef2c(MADS)/GM12878-Mef2c-ChIP-Seq(GSE32465)/Homer                | DCYAAAAATAGM              | 1,00E-02       |
| HIF-1a(bHLH)/MCF7-HIF1a-ChIP-Seq(GSE28352)/Homer                  | TACGTGCV                  | 1,00E-02       |
| CES-1(Homeobox)/cElegans-L1-CES1-ChIP-Seq(modEncode)/Homer        | AAATTS AATTTN             | 1,00E-02       |

**Supplementary Table 3: Enrichment in Transcription factor binding regions +/- 200 bp around the CpG in Cluster 1:**Regions ranging +/- 200bp of CpG in Cluster 1 were overlapped with all ENCODE phase 2 ChIP-seq data using the HOMER software mergePeaks.pl function. The most significant overlap between ChIP-seq experiments are presented

| <b>Encode-ChIP-seq experiments</b>                              | <b>log p-value</b> |
|-----------------------------------------------------------------|--------------------|
| wgEncodeAwgTfbsHaibGm12878Runx3sc101553V0422111UniPk.narrowPeak | -1307.191394       |
| wgEncodeAwgTfbsHaibGm12878Ebf1sc137065Pcr1xUniPk.narrowPeak     | -1032.143885       |
| wgEncodeAwgTfbsHaibGm12878Pol2Pcr2xUniPk.narrowPeak             | -905.295998        |
| wgEncodeAwgTfbsHaibGm12878Pu1Pcr1xUniPk.narrowPeak              | -756.838075        |
| wgEncodeAwgTfbsHaibGm12891Pu1Pcr1xUniPk.narrowPeak              | -719.308023        |
| wgEncodeAwgTfbsHaibGm12878Nfisc81335V0422111UniPk.narrowPeak    | -695.542770        |
| wgEncodeAwgTfbsHaibGm12878Pol24h8Pcr1xUniPk.narrowPeak          | -690.734033        |
| wgEncodeAwgTfbsHaibGm12878Elf1sc631V0416101UniPk.narrowPeak     | -676.314099        |
| wgEncodeAwgTfbsSydhGm12891Pol2IggmusUniPk.narrowPeak            | -674.196282        |
| wgEncodeAwgTfbsSydhGm12891NfkbTnfaIgggrabUniPk.narrowPeak       | -669.386861        |
| wgEncodeAwgTfbsSydhGm12892Pol2IggmusUniPk.narrowPeak            | -660.914294        |
| wgEncodeAwgTfbsHaibGm12878Pax5n19Pcr1xUniPk.narrowPeak          | -651.045595        |
| wgEncodeAwgTfbsSydhGm18505Pol2IggmusUniPk.narrowPeak            | -617.459111        |
| wgEncodeAwgTfbsHaibGm12878Tcf12Pcr1xUniPk.narrowPeak            | -616.588019        |
| wgEncodeAwgTfbsHaibGm12878BatfPcr1xUniPk.narrowPeak             | -606.686300        |
| wgEncodeAwgTfbsSydhGm12878Pol2IggmusUniPk.narrowPeak            | -604.504914        |
| wgEncodeAwgTfbsHaibGm12878Bcl11aPcr1xUniPk.narrowPeak           | -590.966615        |
| wgEncodeAwgTfbsSydhGm19193Pol2IggmusUniPk.narrowPeak            | -581.292330        |
| wgEncodeAwgTfbsSydhGm12878P300IggmusUniPk.narrowPeak            | -571.425067        |
| wgEncodeAwgTfbsSydhGm12878Ebf1sc137065UniPk.narrowPeak          | -554.997897        |
| wgEncodeAwgTfbsHaibGm12878Atf2sc81188V0422111UniPk.narrowPeak   | -553.517141        |
| wgEncodeAwgTfbsSydhGm19099Pol2IggmusUniPk.narrowPeak            | -549.286773        |
| wgEncodeAwgTfbsHaibGm12878Sp1Pcr1xUniPk.narrowPeak              | -546.174185        |
| wgEncodeAwgTfbsHaibGm12878Foxm1sc502V0422111UniPk.narrowPeak    | -533.562676        |
| wgEncodeAwgTfbsHaibGm12892Pol2V0416102UniPk.narrowPeak          | -527.597142        |
| wgEncodeAwgTfbsSydhGm12878Mxi1IggmusUniPk.narrowPeak            | -514.472053        |
| wgEncodeAwgTfbsSydhNb4MaxUniPk.narrowPeak                       | -513.648998        |
| wgEncodeAwgTfbsHaibGm12878Pmlsc71910V0422111UniPk.narrowPeak    | -511.995511        |
| wgEncodeAwgTfbsHaibGm12878Tcf3Pcr1xUniPk.narrowPeak             | -511.239687        |
| wgEncodeAwgTfbsHaibGm12878Mta3sc81325V0422111UniPk.narrowPeak   | -510.966613        |
| wgEncodeAwgTfbsHaibGm12878Pou2f2Pcr1xUniPk.narrowPeak           | -509.696966        |

**Supplementary Table 4: Enrichment in Transcription factor binding regions +/- 200 bp**

**around the CpG in Cluster 2:** Regions ranging +/- 200bp of CpG in Cluster 1 and 2 were overlapped with all ENCODE phase 2 ChIP-seq data using the HOMER software mergePeaks.pl function. The ten most significant overlap between ChIP-seq experiments are presented with the TF ChIPped , the cell line used and the ID of the ENCODE experiment.

| <b>Encode-ChIP-seq experiments</b>                                 | <b>log p-value</b> |
|--------------------------------------------------------------------|--------------------|
| wgEncodeAwgTfbsHaibT47dGata3sc268V0416102Dm002p1hUniPk.narrowPeak  | -440.982472        |
| wgEncodeAwgTfbsHaibHepg2Foxa1sc6553V0416101UniPk.narrowPeak        | -418.416417        |
| wgEncodeAwgTfbsHaibT47dFoxa1sc6553V0416102Dm002p1hUniPk.narrowPeak | -395.686496        |
| wgEncodeAwgTfbsHaibHepg2Foxa1sc101058V0416101UniPk.narrowPeak      | -393.268593        |
| wgEncodeAwgTfbsHaibHepg2Foxa2sc6554V0416101UniPk.narrowPeak        | -360.501327        |
| wgEncodeAwgTfbsSydhMcf7Gata3sc269UcdUniPk.narrowPeak               | -335.628062        |
| wgEncodeAwgTfbsHaibGm12878Runx3sc101553V0422111UniPk.narrowPeak    | -312.729035        |
| wgEncodeAwgTfbsHaibGm12878Ebf1sc137065Pcr1xUniPk.narrowPeak        | -262.653251        |
| wgEncodeAwgTfbsSydhNb4MaxUniPk.narrowPeak                          | -248.992820        |
| wgEncodeAwgTfbsSydhNb4CmycUniPk.narrowPeak                         | -226.023248        |
| wgEncodeAwgTfbsSydhShsy5yGata2UcdUniPk.narrowPeak                  | -223.782382        |
| wgEncodeAwgTfbsHaibT47dEralphaaPcr2xGen1hUniPk.narrowPeak          | -216.280272        |
| wgEncodeAwgTfbsHaibHepg2P300V0416101UniPk.narrowPeak               | -215.839981        |
| wgEncodeAwgTfbsHaibT47dEralphaaV0416102Est10nm1hUniPk.narrowPeak   | -213.533919        |
| wgEncodeAwgTfbsSydhMcf10aesCfosTam112hHvdUniPk.narrowPeak          | -198.945163        |
| wgEncodeAwgTfbsSydhMcf7Znf217UcdUniPk.narrowPeak                   | -196.413545        |
| wgEncodeAwgTfbsHaibSknsbraP300V0416102UniPk.narrowPeak             | -193.962428        |
| wgEncodeAwgTfbsHaibGm12878Elf1sc631V0416101UniPk.narrowPeak        | -187.934791        |
| wgEncodeAwgTfbsUtaMcf7CmycVehUniPk.narrowPeak                      | -187.194725        |
| wgEncodeAwgTfbsSydhMcf10aesCfosEtoh01HvdUniPk.narrowPeak           | -183.046813        |
| wgEncodeAwgTfbsSydhHelas3CebpbIggrabUniPk.narrowPeak               | -180.557658        |
| wgEncodeAwgTfbsHaibHepg2Fosl2V0416101UniPk.narrowPeak              | -179.826868        |
| wgEncodeAwgTfbsHaibA549Fosl2V0422111Etoh02UniPk.narrowPeak         | -177.755509        |
| wgEncodeAwgTfbsHaibHepg2Nficsc81335V0422111UniPk.narrowPeak        | -175.120039        |
| wgEncodeAwgTfbsSydhMcf10aesCfosTam14hHvdUniPk.narrowPeak           | -174.195838        |
| wgEncodeAwgTfbsSydhMcf7Tcf712UcdUniPk.narrowPeak                   | -172.792227        |
| wgEncodeAwgTfbsHaibA549GrPcr1xDex50nmUniPk.narrowPeak              | -171.773724        |
| wgEncodeAwgTfbsHaibGm12878Nficsc81335V0422111UniPk.narrowPeak      | -170.925082        |
| wgEncodeAwgTfbsSydhImr90CebpbIggrabUniPk.narrowPeak                | -170.316701        |
| wgEncodeAwgTfbsHaibGm12891Pu1Pcr1xUniPk.narrowPeak                 | -170.023966        |
| wgEncodeAwgTfbsSydhMcf10aesStat3Etoh01bUniPk.narrowPeak            | -169.954835        |
| wgEncodeAwgTfbsHaibGm12878Tcf12Pcr1xUniPk.narrowPeak               | -164.352192        |
| wgEncodeAwgTfbsHaibGm12878Pu1Pcr1xUniPk.narrowPeak                 | -163.737743        |
| wgEncodeAwgTfbsSydhMcf10aesStat3Tam112hHvdUniPk.narrowPeak         | -162.336937        |
| wgEncodeAwgTfbsHaibK562MaxV0416102UniPk.narrowPeak                 | -162.304054        |
| wgEncodeAwgTfbsSydhMcf10aesStat3Etoh01cUniPk.narrowPeak            | -160.455133        |
| wgEncodeAwgTfbsHaibHepg2Hdac2sc6296V0416101UniPk.narrowPeak        | -157.295885        |
| wgEncodeAwgTfbsHaibHuvecPol24h8V0416101UniPk.narrowPeak            | -156.754475        |
| wgEncodeAwgTfbsSydhGm12891NfkbTnfaIggrabUniPk.narrowPeak           | -156.026894        |
| wgEncodeAwgTfbsHaibHepg2RxxraPcr1xUniPk.narrowPeak                 | -155.394755        |
| wgEncodeAwgTfbsSydhMcf7Gata3UcdUniPk.narrowPeak                    | -155.234500        |
| wgEncodeAwgTfbsSydhMcf10aesCmycTam14hHvdUniPk.narrowPeak           | -154.414784        |
| wgEncodeAwgTfbsHaibHepg2JundPcr1xUniPk.narrowPeak                  | -154.209765        |
| wgEncodeAwgTfbsHaibGm12878Pax5n19Pcr1xUniPk.narrowPeak             | -152.820983        |
| wgEncodeAwgTfbsHaibA549Tcf12V0422111Etoh02UniPk.narrowPeak         | -150.979321        |

**Supplementary Table 5:** Subtype specific emQTL analysis. Number of significant associations, CpGs or Genes is shown, and the percentage of rediscovered associations, CpGs or genes is shown in parenthesis.

|                                     | <b>Luminal A<br/>N=236</b> | <b>LuminalB<br/>N=137</b> | <b>Her2 enriched<br/>N=49</b> | <b>Basal-like<br/>N=92</b> | <b>Normal-like<br/>N=44</b> |
|-------------------------------------|----------------------------|---------------------------|-------------------------------|----------------------------|-----------------------------|
| <b>Total number of associations</b> | 4,689,557                  | 1,647,259                 | 21,161                        | 2,036,164                  | 178                         |
| <b>emQTL rediscovered</b>           | 244,388 (33.0%)            | 149,841 (20.3%)           | 4,212 (0.57%)                 | 116,206 (15.7%)            | 17 (0.00023%)               |
| <b>Cluster 1 genes rediscovered</b> | 159 (98.8%)                | 159 (98.8%)               | 96 (59.6%)                    | 153 (95,0%)                | 16 (9.9%)                   |
| <b>Cluster 1 CpGs rediscovered</b>  | 2,471 (72.7%)              | 2,070 (60.9%)             | 1,082 (31.8%)                 | 2,389 (70.2%)              | 4 (0.12%)                   |
| <b>Cluster 2 genes rediscovered</b> | 137 (50.6%)                | 115 (42.4%)               | 6 (2.2%)                      | 14 (5.2%)                  | 6 (2.2%)                    |
| <b>Cluster 2 CpGs rediscovered</b>  | 2,514 (69.8%)              | 1,624 (45.1%)             | 74 (2.1%)                     | 107 (3%)                   | 13 (0.36%)                  |
